# Supplementary material for: Specific N-cadherin–dependent pathways drive human breast cancer dormancy in bone marrow
Source: PubMed Central journal article supplement (PMC8200294; doi:10.26508/lsa.202000969), 2021-06-02

Figure 1A

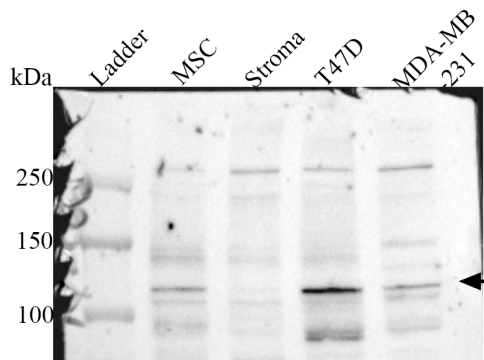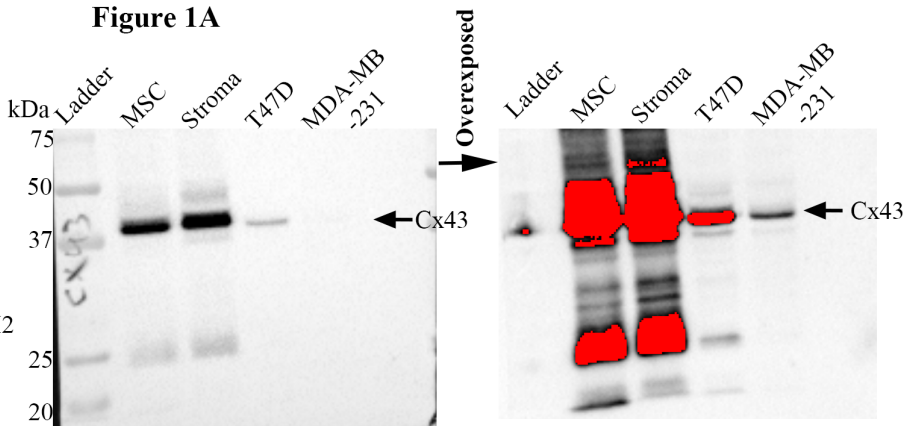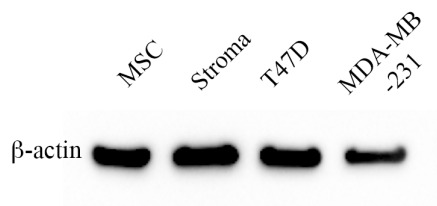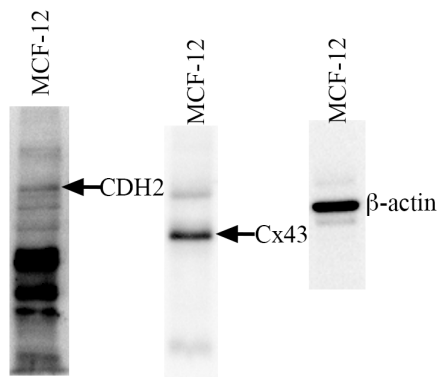

**Figure: 3E**

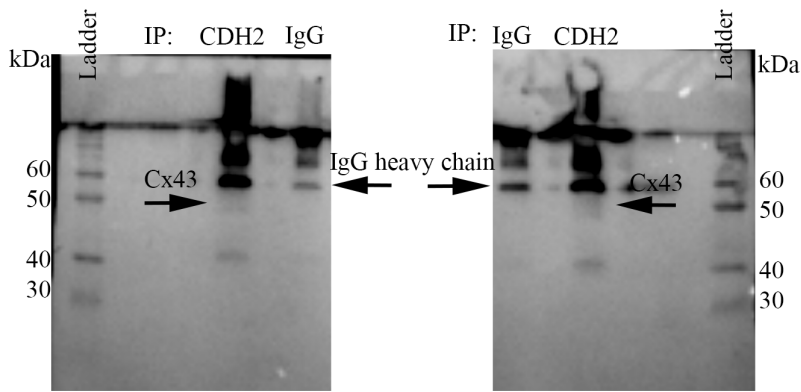

**Figure: 3F**

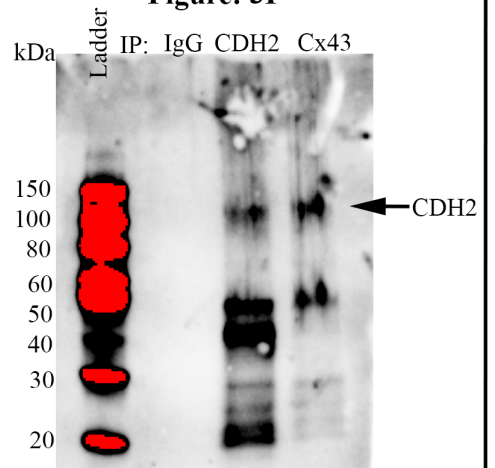

**Figure 3G**

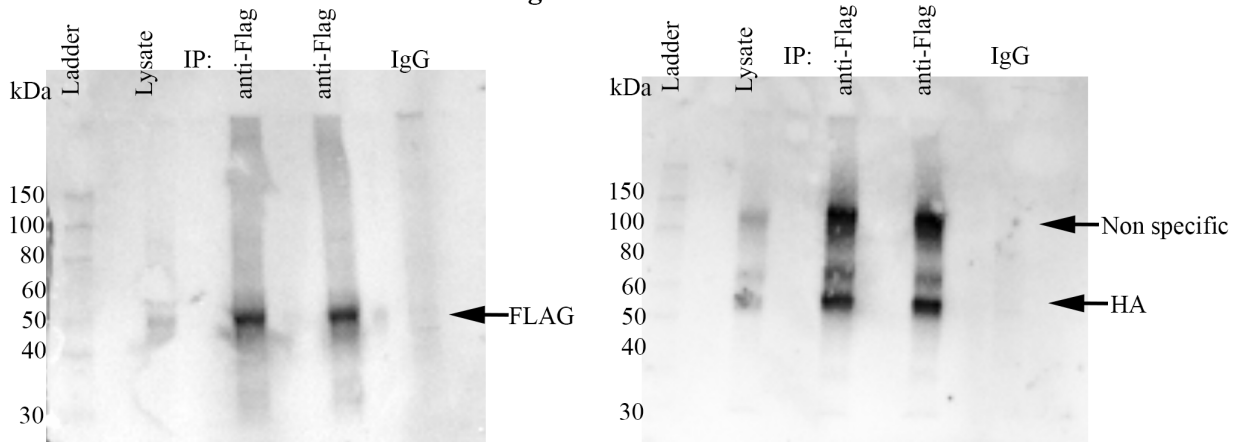

**Figure 3H**

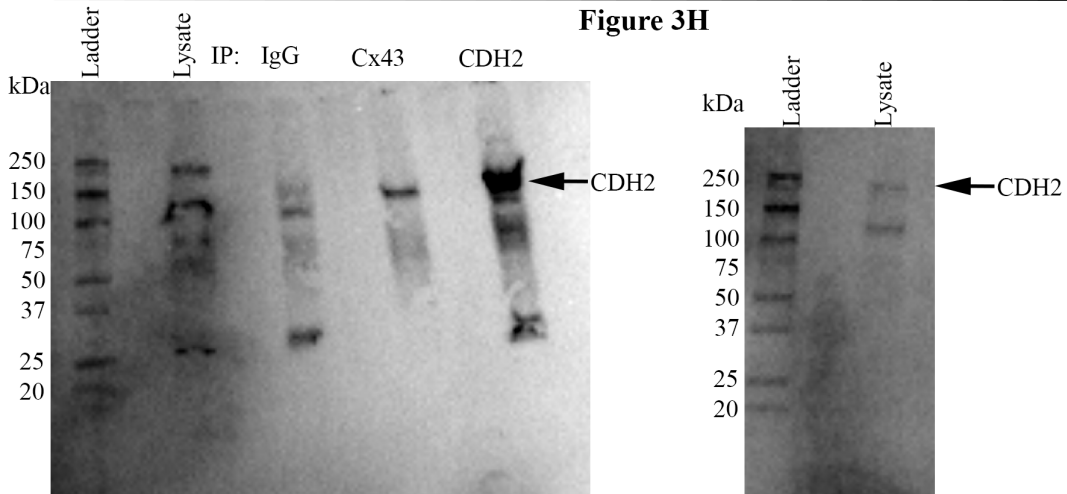

**Figure 5G**

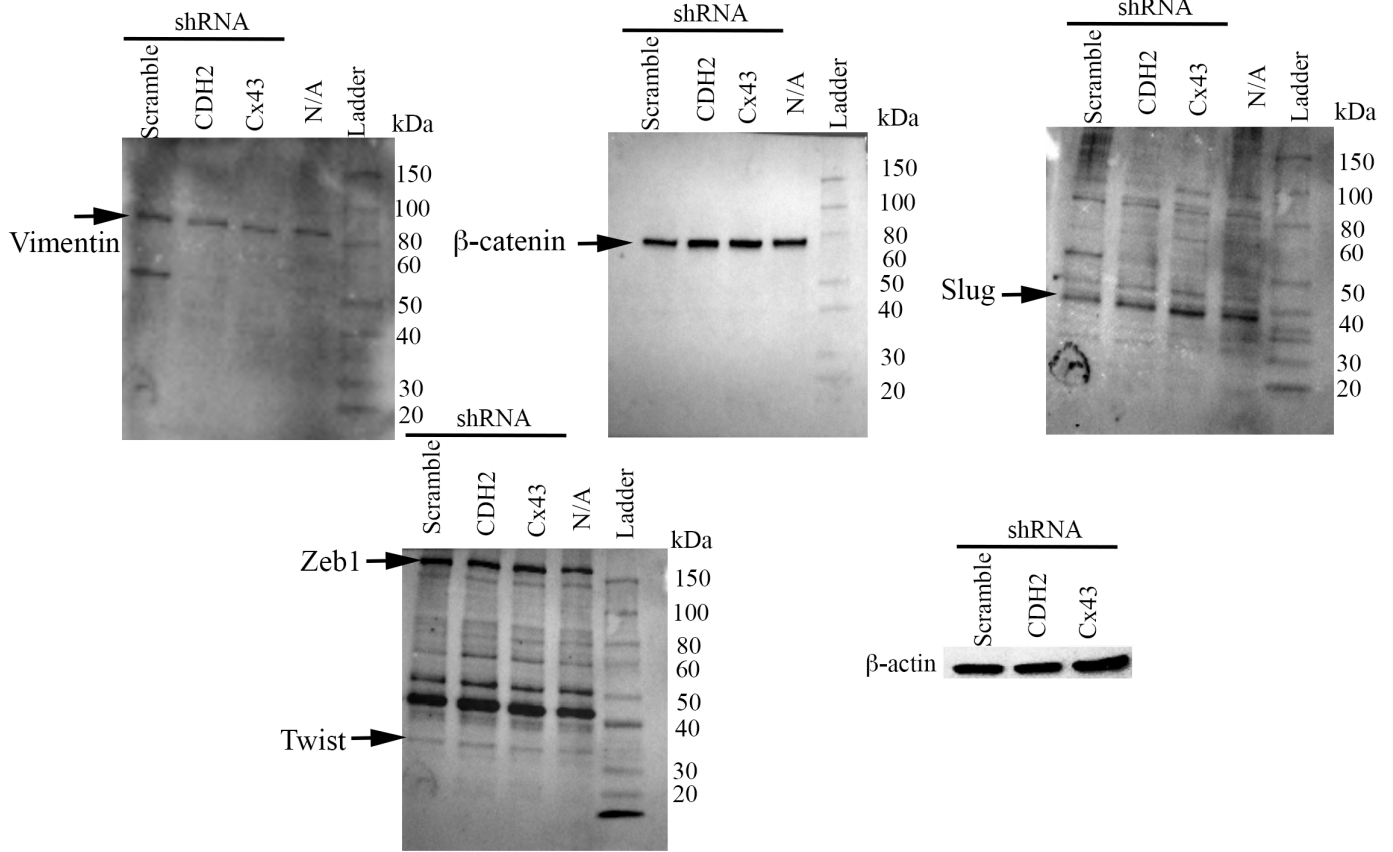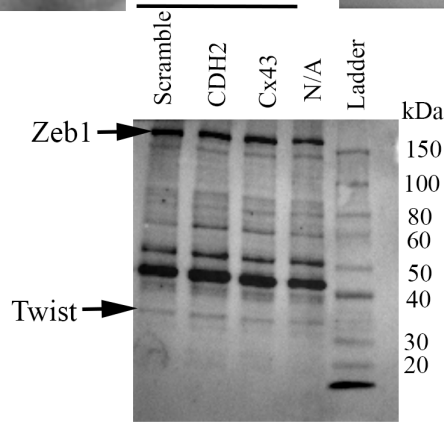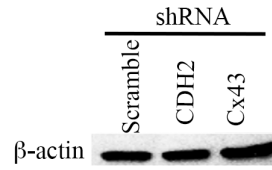

**Figure 5G (second set)**

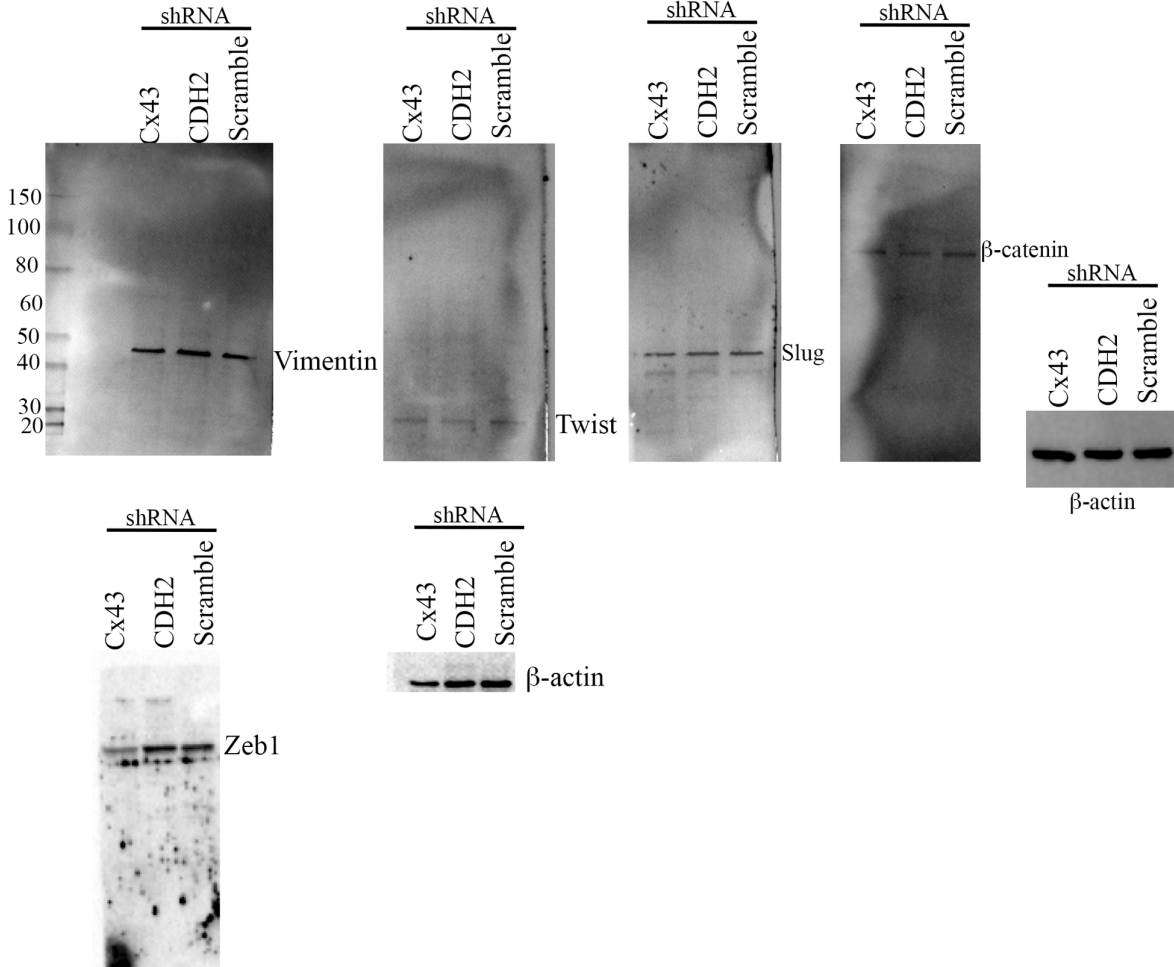

**Figure 5H**

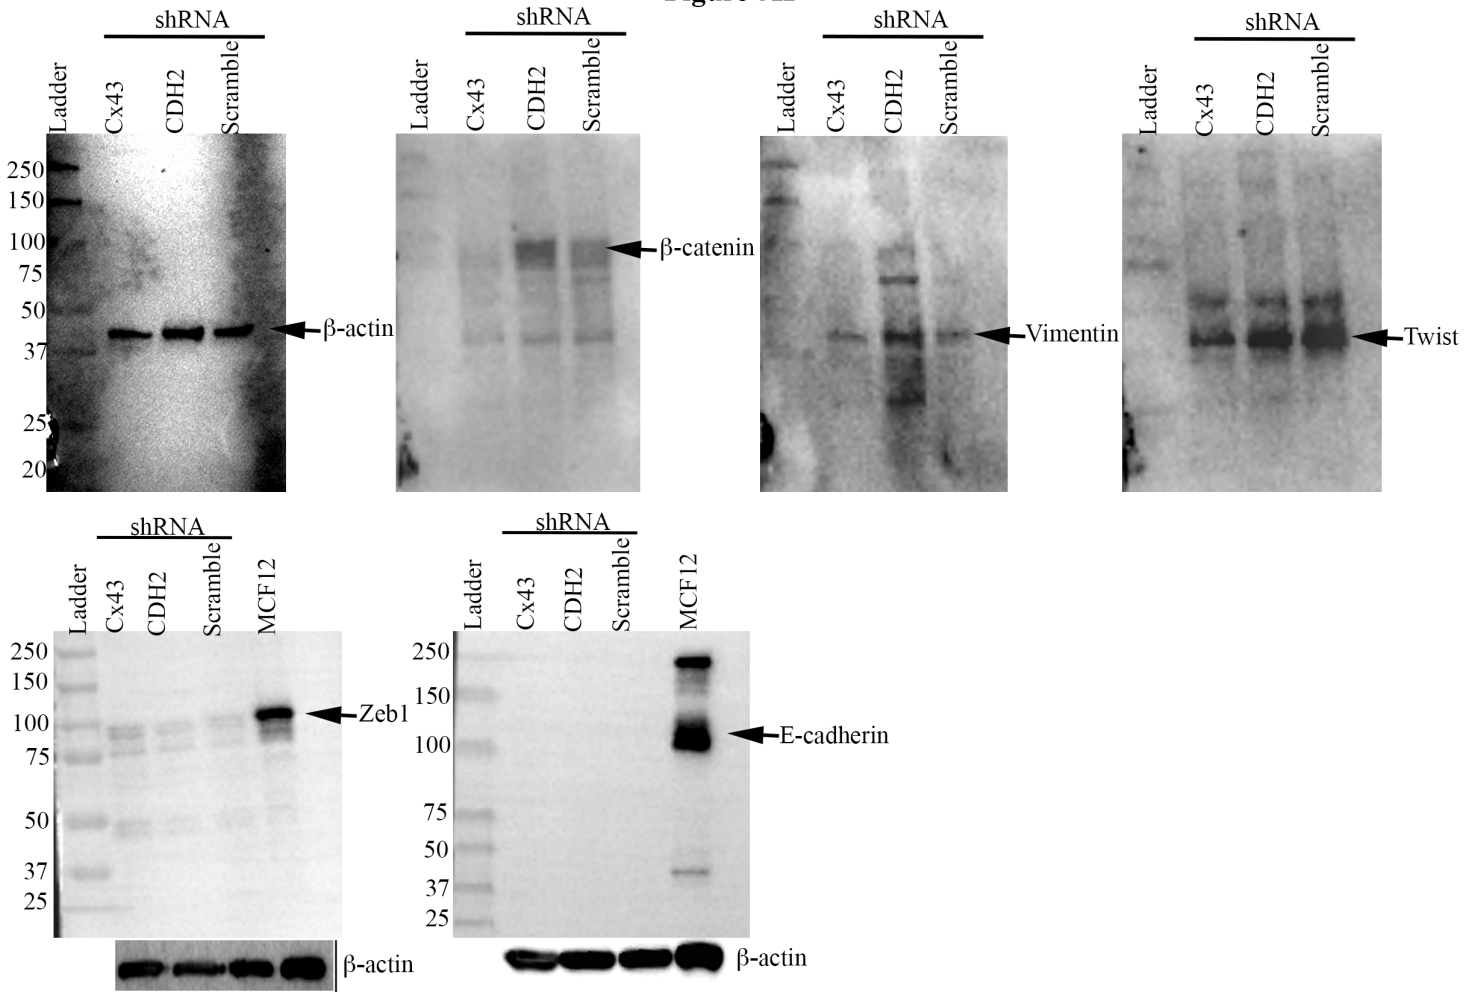

**Figure 5I**

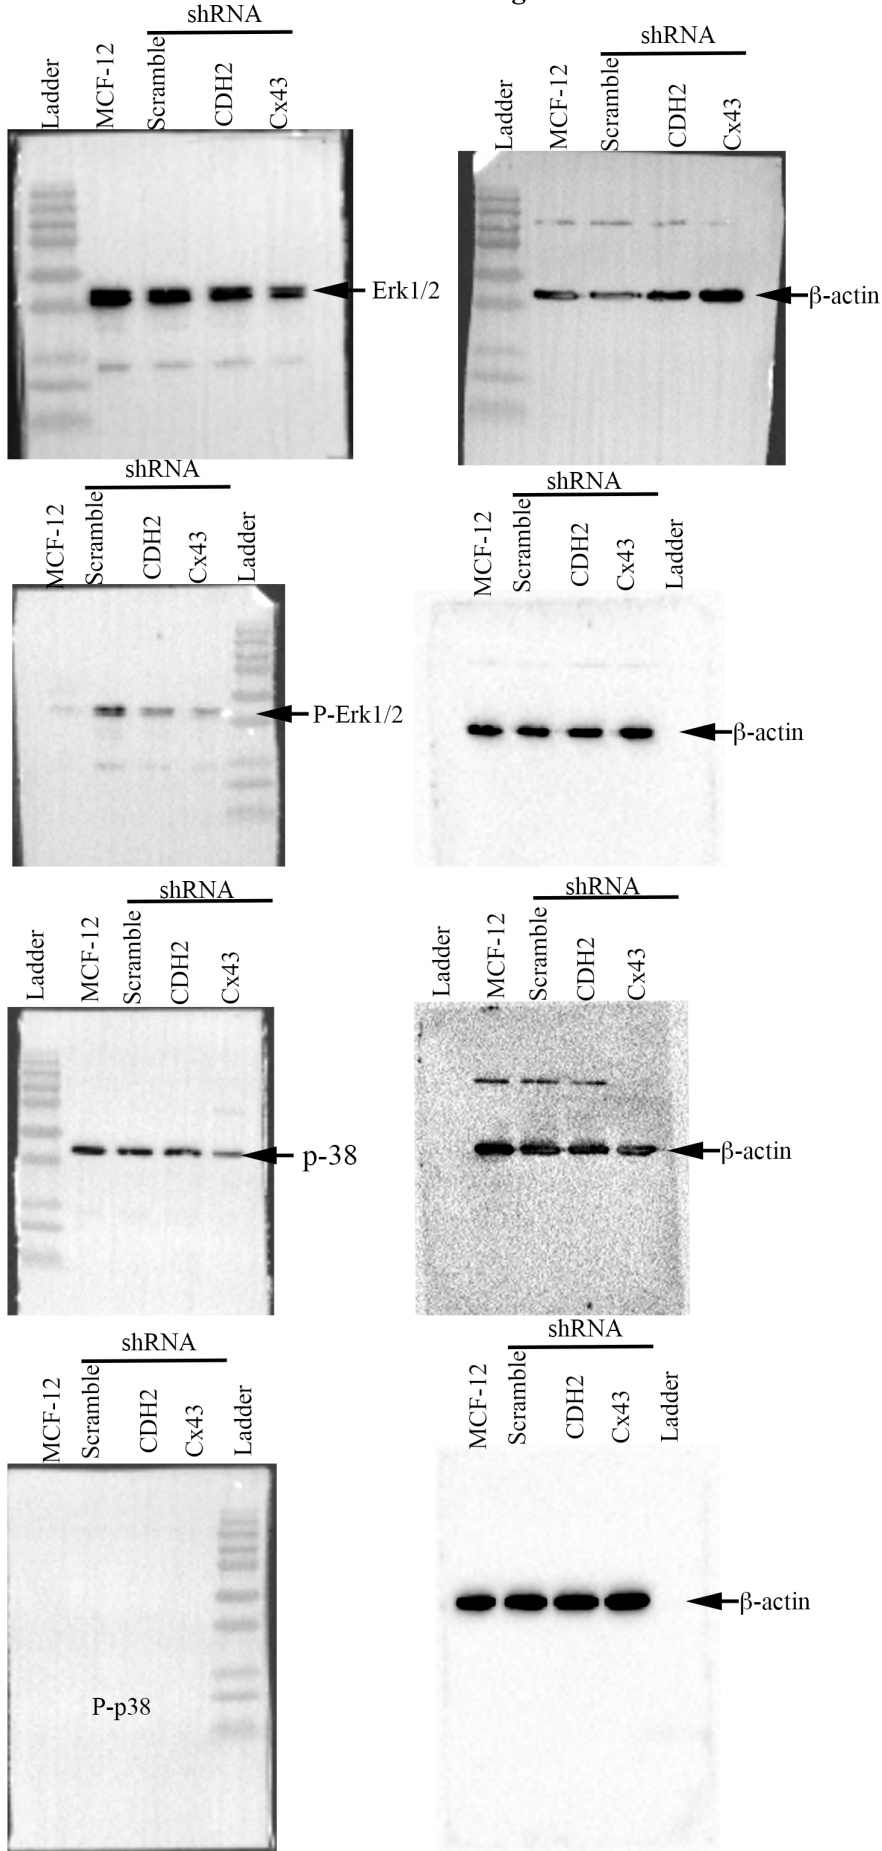

**Figure 6G**

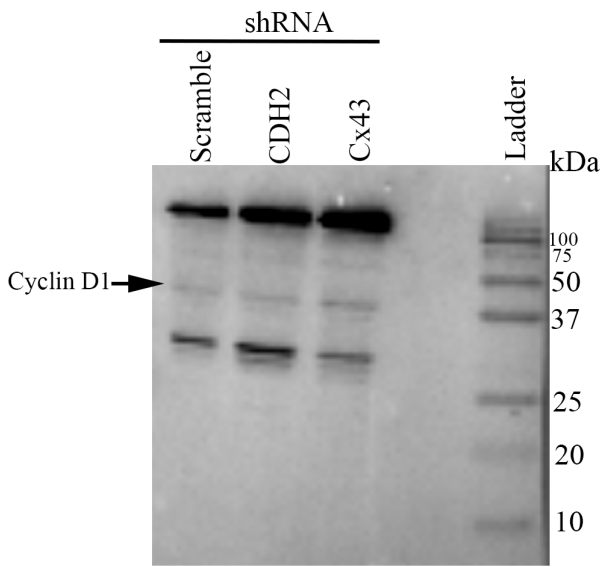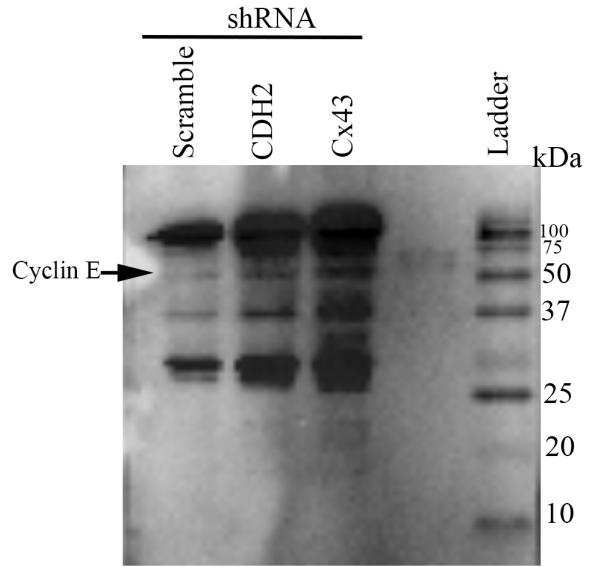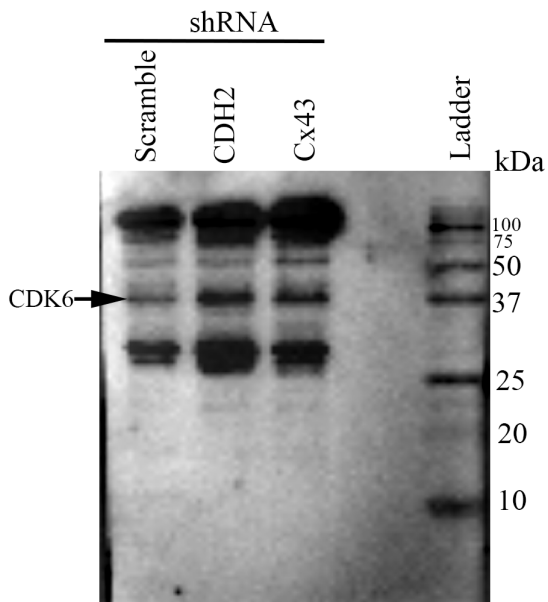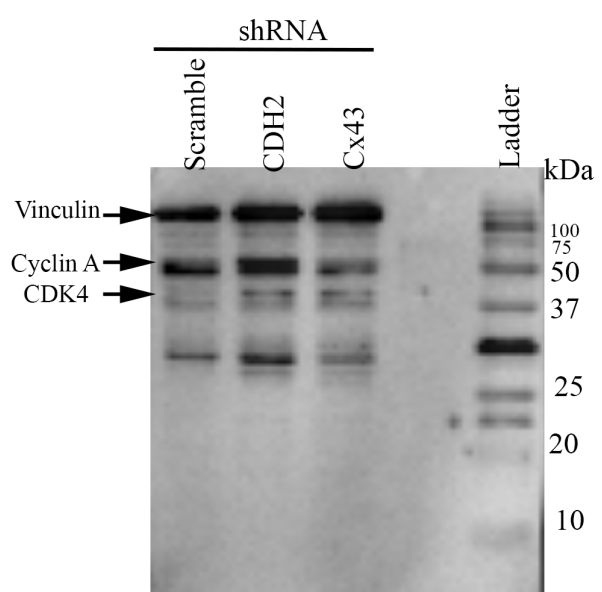

**Figure 7B**

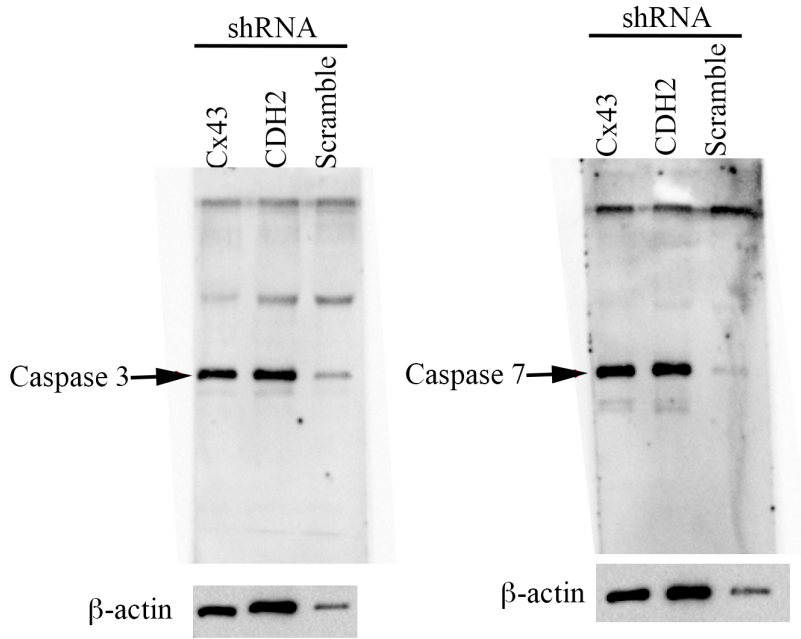

**Figure 7D**

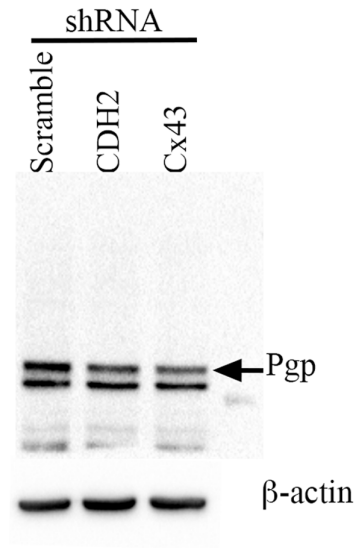

**Figure 7B (2nd replicate)**

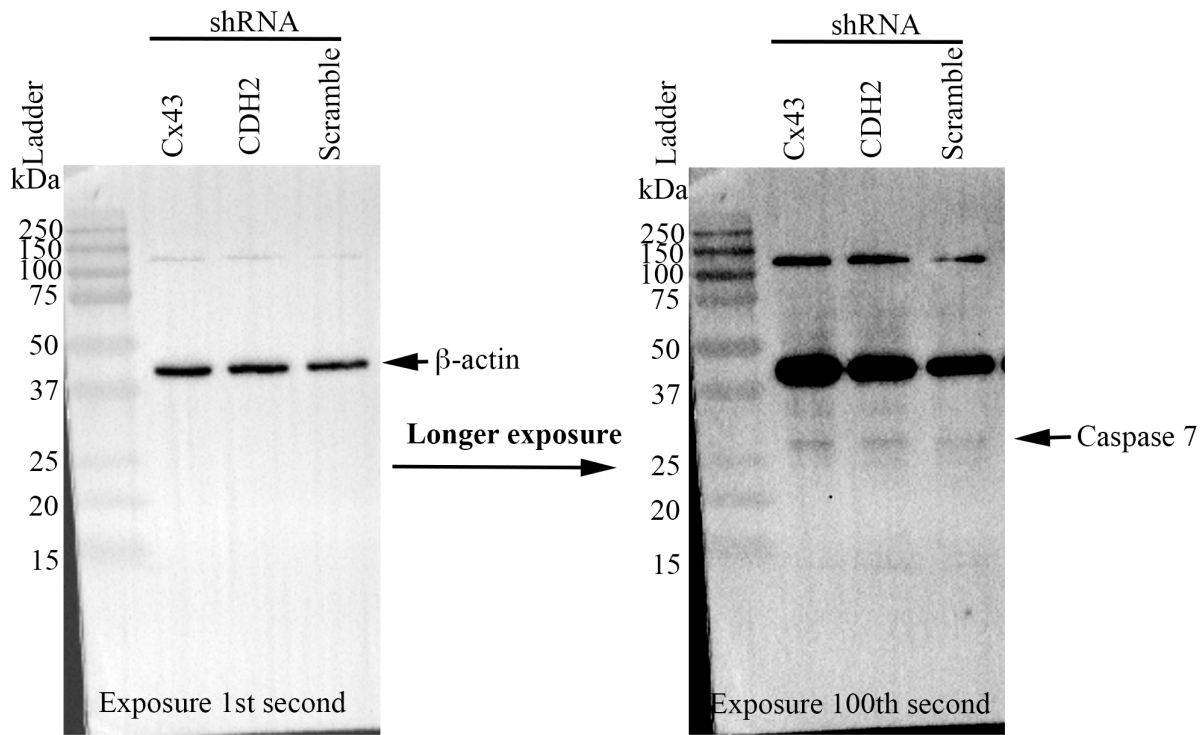

**Figure S1D**

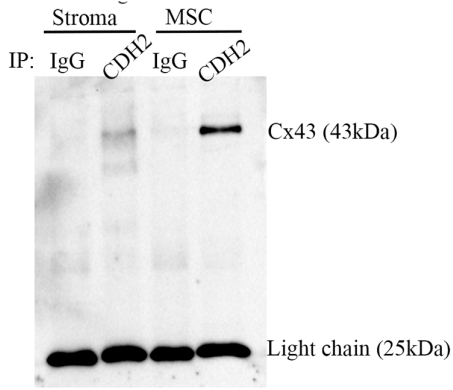

**Figure S1F**

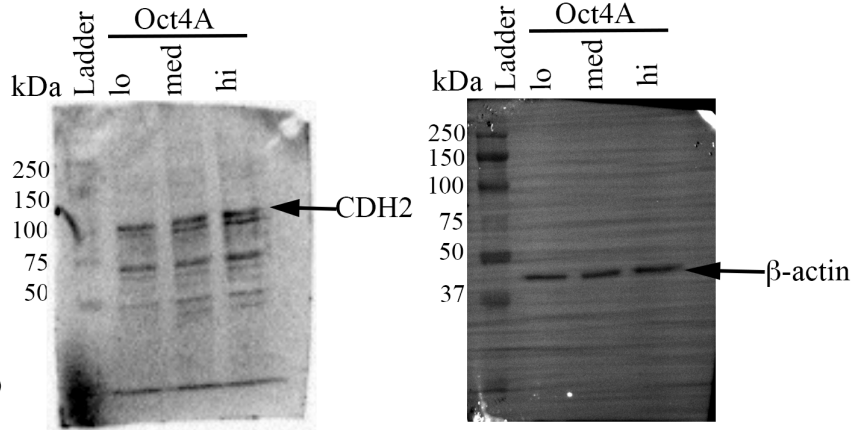

**Figure S1H**

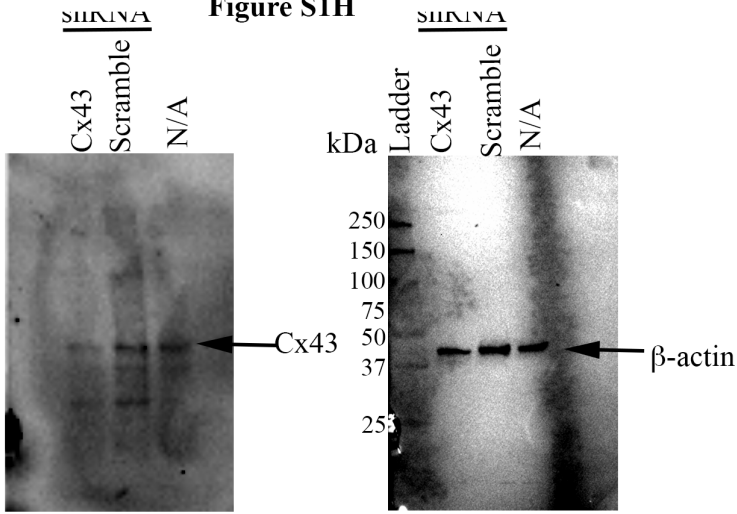

**Figure S1K**

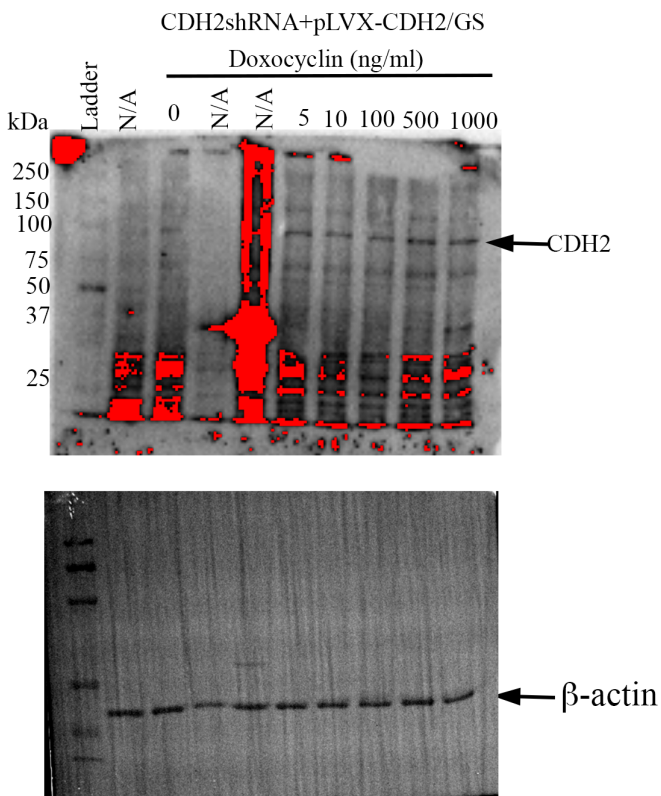

**Figure S1L**

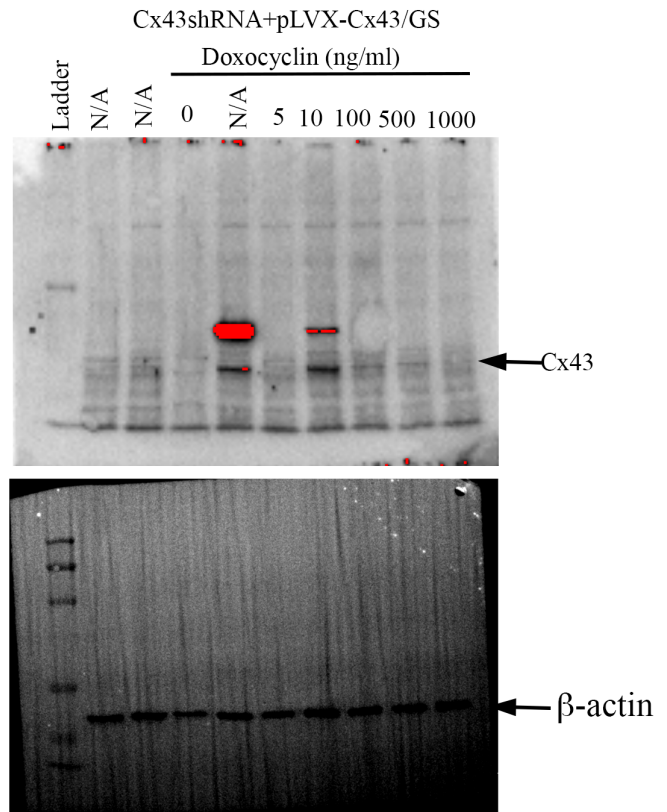

Supplement: LSA-2020-00969_SdataF1.pdf [file LSA-2020-00969_SdataF1.pdf]
