# Supplementary material for: Specific N-cadherin–dependent pathways drive human breast cancer dormancy in bone marrow
Source: Life Sci Alliance. 2021 Jun 2;4(7):e202000969. doi: 10.26508/lsa.202000969 (PMC8200294; doi:10.26508/lsa.202000969)
Supplement: Supplementary file 2 [file LSA-2020-00969_TableS1.xlsx]

## Sheet: Sheet1
Patient Demographic
Patient #	Age	Sex	Ethnicity	Cancer Stage	Treatment	Collection Time of Biopsy before or after therapy)
BREAST CANCER BM BIOPSIES
Patient 1	66	F	White	IV	Radiation	After
Patient 2	66	F	White	Recurrent	Unknown	After
Patient 3	61	F	White	Recurrent	Unknown	After
Patient 4	71	F	White	IV	No	Before
Patient 5	78	F	White	Recurrent	Chemo	After
Patient 6	52	F	White	Recurrent	Unknown	After
Patient 7	33	F	White	IV	Radiation	After
Patient 8	66	F	White	IV	Radiation	After
Patient 9	66	F	White	Recurrent	Unknown	After
Patient 10	61	F	White	Recurrent	Unknown	After
Patient 11	78	F	White	Recurrent	Chemo	After
Patient 12	52	F	White	Recurrent	Unknown	After
Patient 13	33	F	White	IV	Radiation	After
Patient 14	43	F	White	Recurrent	Unknown	After
Patient 15	49	F	White	Recurrent	Unknown	After
Patient 16	49	F	White	Recurrent	Unknown	After
Patient 17	60	F	White	Recurrent	Chemo	After
Patient 18	60	F	White	Recurrent	Chemo	After
Patient 19	60	F	Black	Recurrent	Chemo, Radiation, And B/L Mastectomies	After
Patient 20	38	F	Hispanic	Recurrent	Chemo	After
Patient 21	65	F	Black	Recurrent	Chemo	After
Patient 22	92	F	White	Recurrent	Unknown	After
BENIGN TUMOR
Patient 23	51	M	Black	Benign/control
Patient 24	60	M	Other	Benign/control
Patient 25	9 mths	M	Other	Benign/control
Patient 26	69	F	White	Benign/control
Patient 27	70	F	Other	Benign/control
HEMATALOGICAL MALIGNANCY
Patient 28	41	M	White	Unknown	No	Before
Patient 29	43	M	Black	In bone only, stage I	No	Before
Patient 30	21	M	White	Local region of LN, stage II	No	Before
Patient 31	21	M	White	Local region of LN, stage II	No	Before
Patient 32	49	M	White	In bone only, stage I	No	Before
Patient 33	25	F	White	Bone and surround soft tissue, stage I	No	Before
Patient 34	78	F	White	Unknown	No	Before
Patient 35	78	F	White	Unknown	No	Before
